# Supplementary material for: Nanoscale zeolitic imidazolate framework-8 as a selective adsorbent for theophylline over caffeine and diprophylline
Source: Royal Society of Chemistry journal article supplement (doi:10.1039/c4ra05293e), 2014-01-01
Supplement: c4ra05293e1.pdf [file c4ra05293e1.pdf]

## Electronic Supplementary Information (ESI)

# Nanoscale zeolitic imidazolate framework-8 as a selective adsorbent for theophylline over caffeine and diprophylline

**Fang Yan<sup>ab</sup>, Zhong-Ying Liu,<sup>a</sup> Xiao-Juan Li,<sup>a</sup> Jin-Long Chen,<sup>\*ab</sup> Xiao-Yan Sun,<sup>c</sup>  
Meng-Xiang Su,<sup>ab</sup> Bo Li,<sup>ab</sup> and Bin Di<sup>\*ab</sup>**

<sup>a</sup>Department of Pharmaceutical Analysis, China Pharmaceutical University, Nanjing 210009, China

<sup>b</sup>Key Laboratory of Drug Quality Control and Pharmacovigilance (China Pharmaceutical University), Ministry of Education, Nanjing 210009, China

<sup>c</sup>Laboratory of Cellular and molecular Biology, Jiangsu Province Institute of Chinese Medicine, Nanjing, 210000, China

Corresponding author E-mail: [dibin@cpu.edu.cn](mailto:dibin@cpu.edu.cn), [chenjl\\_4@hotmail.com](mailto:chenjl_4@hotmail.com)

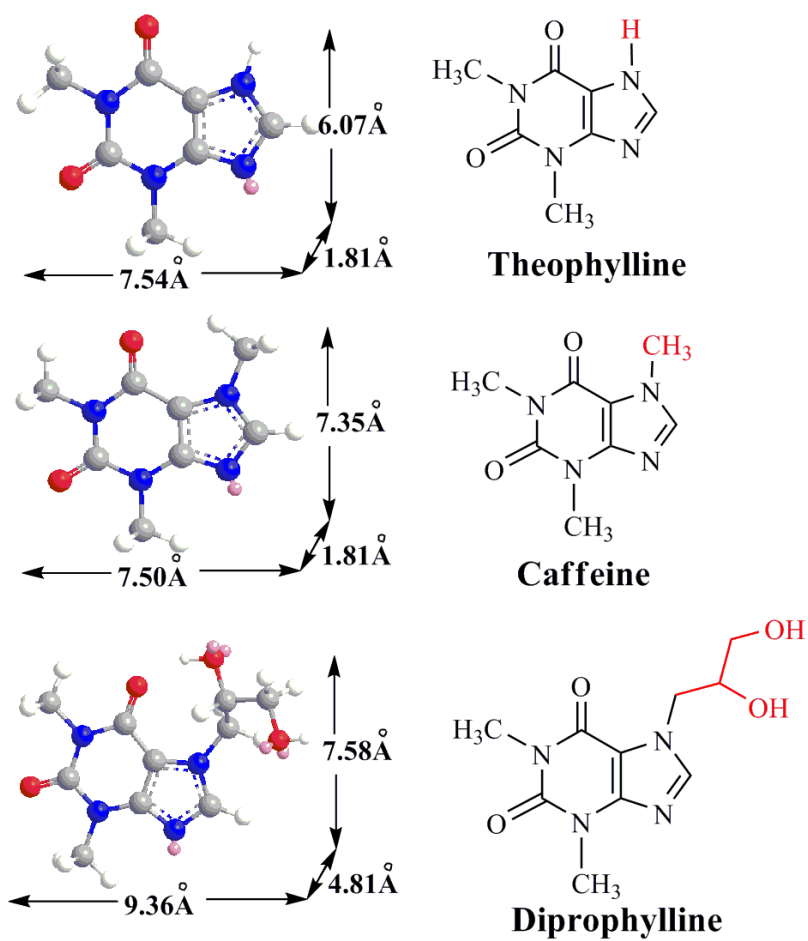

Fig.S1 Structure of xanthine-based pharmaceutical analogs simulated with ChemBioOffice 2008 (Cambridge Soft Corporation). Molecular kinetic diameters were approximated using the minimum cross-sectional area.

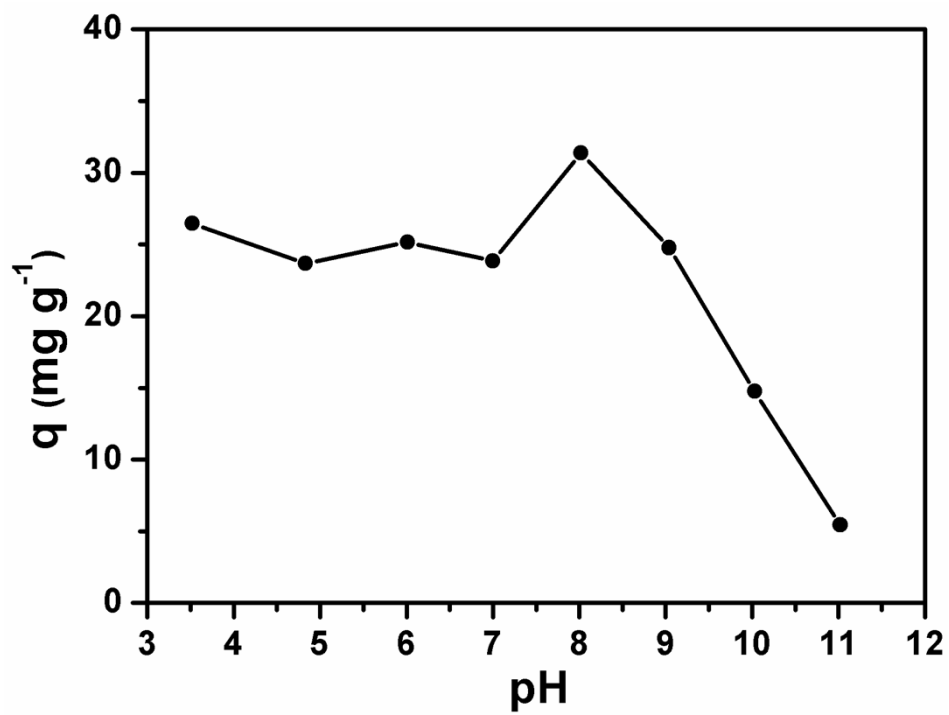

Fig. S2 Effect of pH on the adsorption of TPE ( $100 \text{ mg L}^{-1}$ ) on ZIF-8 ( $10.0 \text{ mg}$ ) containing  $0.01\text{M NaCl}$ .

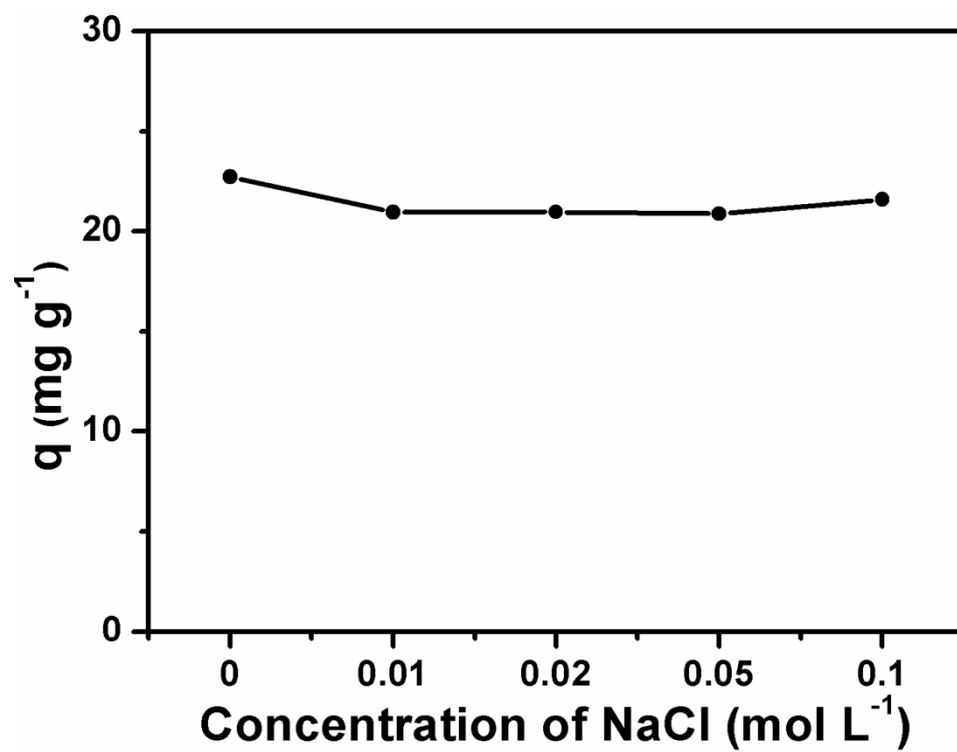

Fig.S3 Effect of the concentration of NaCl on the adsorption of TPE ( $100 \text{ mg L}^{-1}$ ) on ZIF-8 ( $10 \text{ mg L}^{-1}$ ). Other conditions: temperature,  $25^\circ\text{C}$ ; a tris-HCl buffer of pH 8.0.

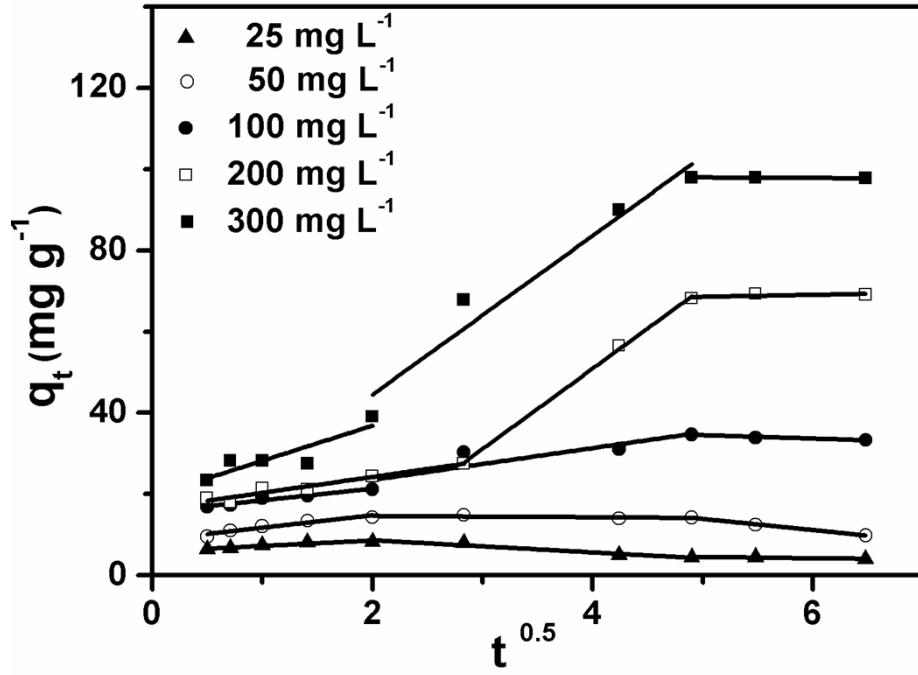

Fig. S4 Intraparticle diffusion plots for the adsorption of TPE on ZIF-8 (10 mg) with different initial concentrations of TPE at 25°C and pH 8.0.

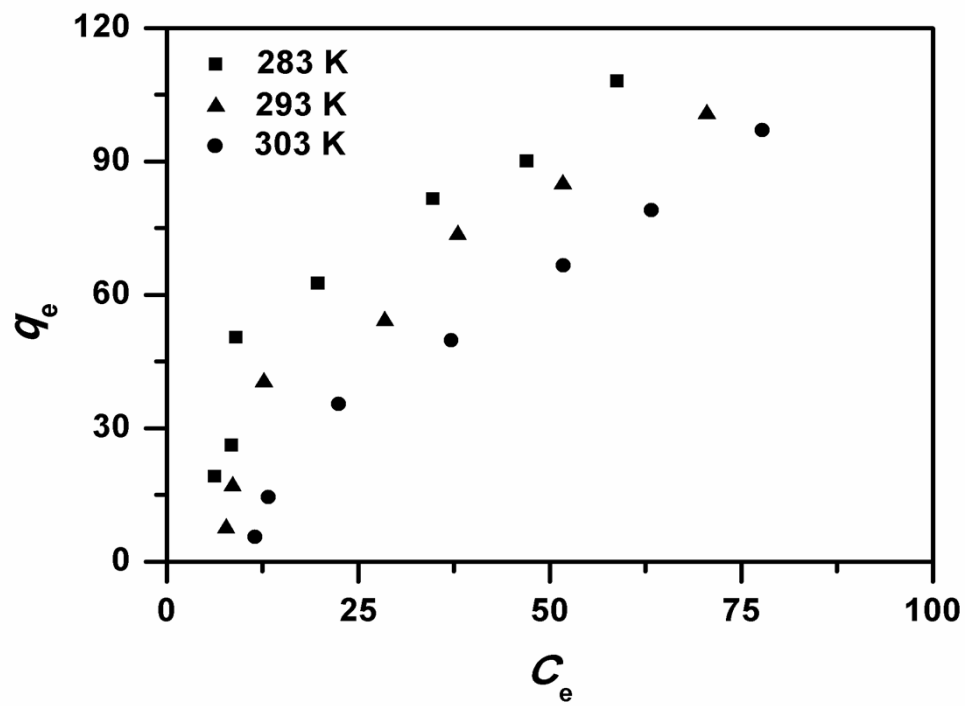

Fig.S5 Adsorption isotherms of TPE onto ZIF-8 at different temperatures.

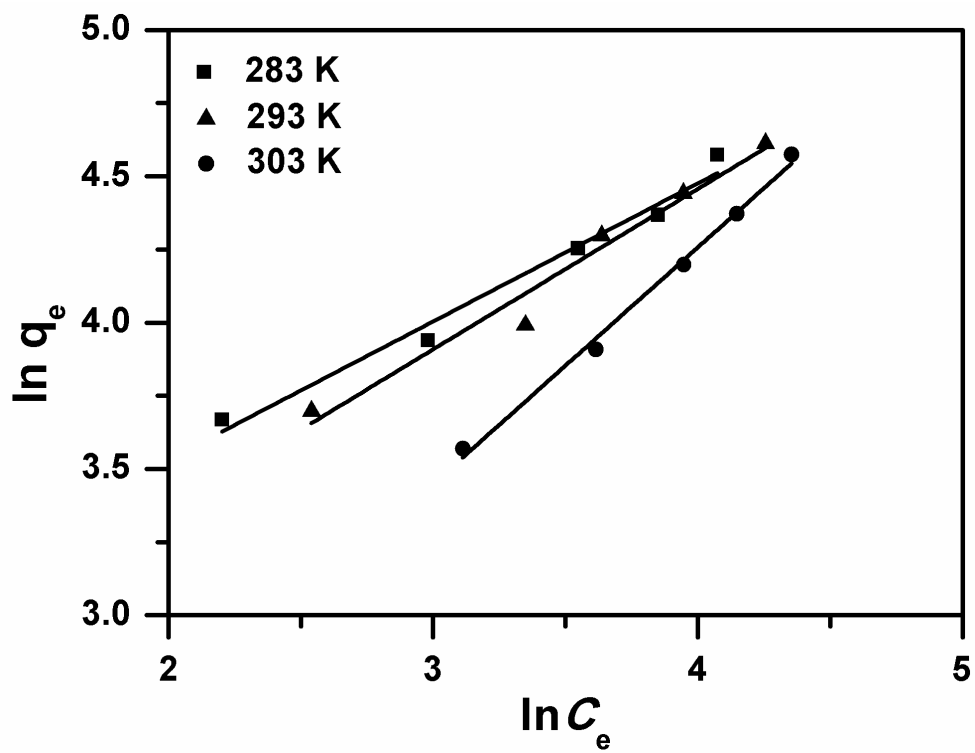

Fig.S6 Linearized Freundlich isotherms for TPE adsorption by the ZIF-8 at different temperatures.

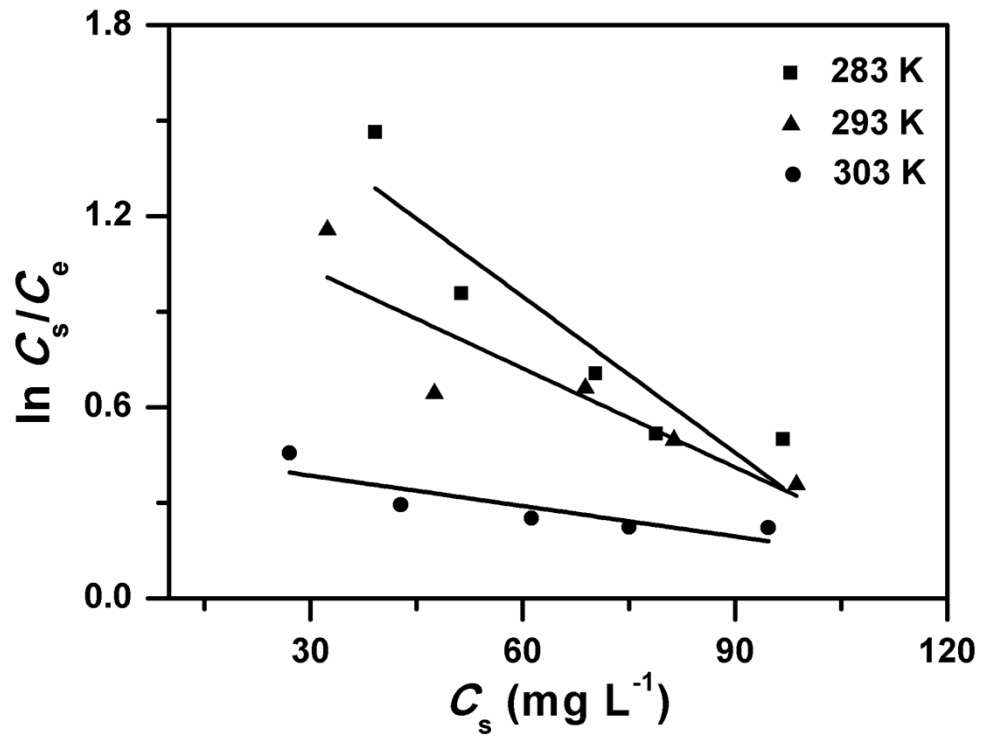

Fig.S7 Plots of  $\ln C_s/C_e$  vs.  $C_s$  at various temperatures.



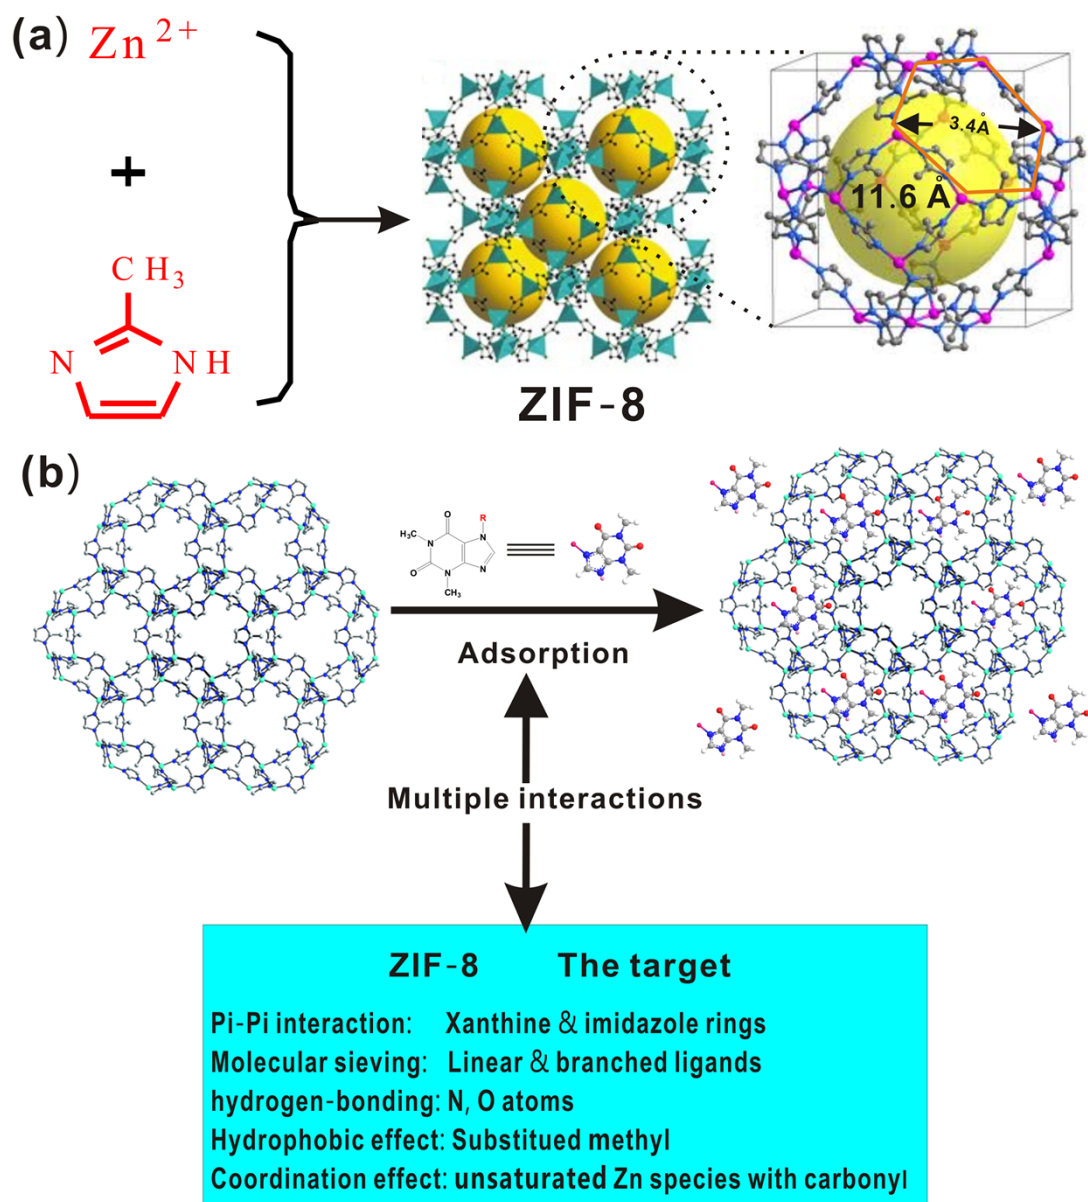

Fig. S8 (a) ZIF-8 composed of zinc (II) and 2-methylimidazole featured with larger cavities (11.6 Å) and small apertures (3.4Å), this figure is a combination of figures from Ref.S1 and in Ref.S2 with little modification. Copyright by 2006 National Academy of Sciences and Copyright 2008 by American Association for the Advancement of Science and with their permissions and (b) Potential part embedding process occurred between the guest molecules and ZIF-8 nanocrystal. This figure is little modified of a figure from Ref.S3. Copyright 2010 by The Royal Society of Chemistry and with permission.

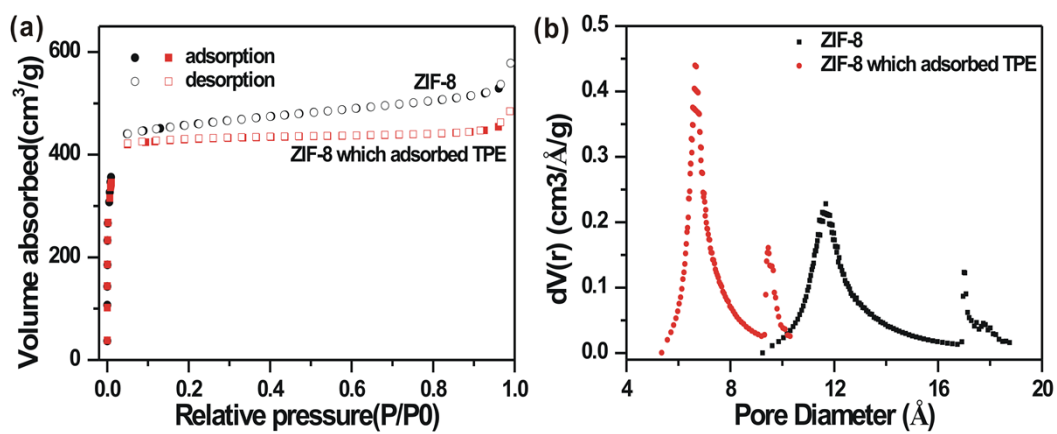

Fig.S9: (a) Nitrogen-sorption-isotherm of the ZIF-8, ZIF-8 which adsorbed TPE. (b) the corresponding pore size distributions calculated by the Horvath–Kawazoe method.

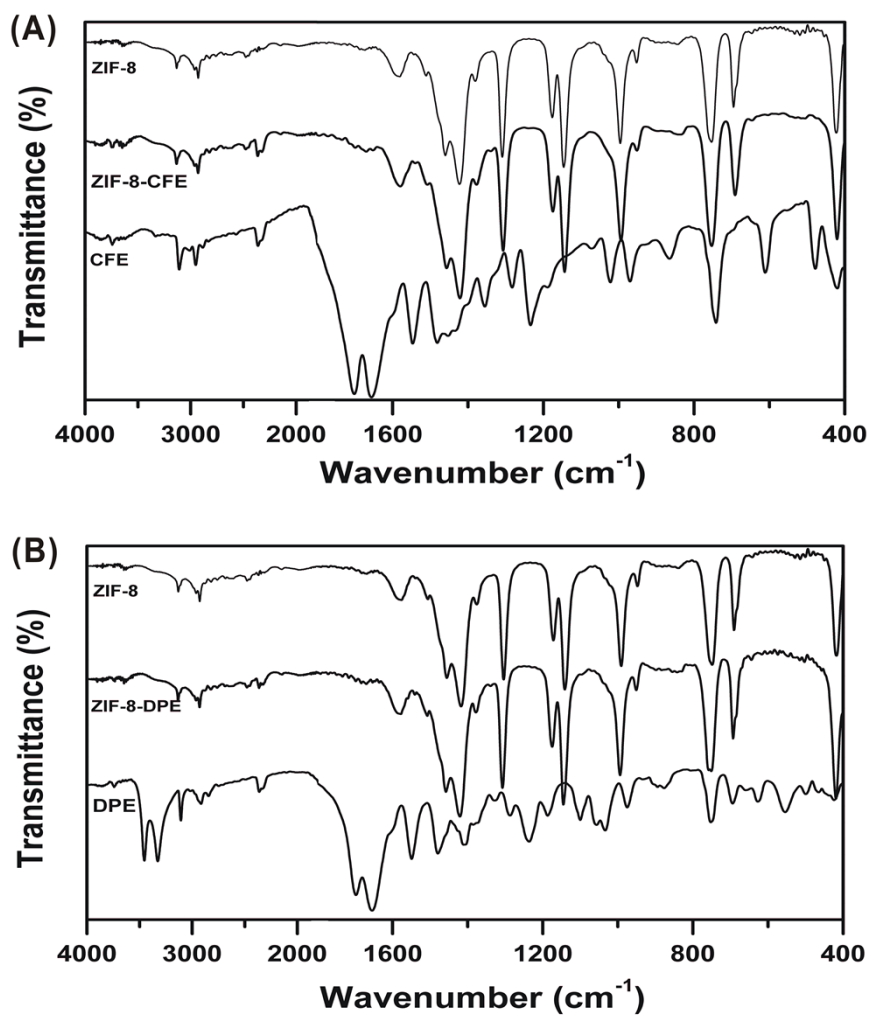

Fig.S10 FT-IR spectra for before and adsorption of CFE (A) and DPE (B) on ZIF-8

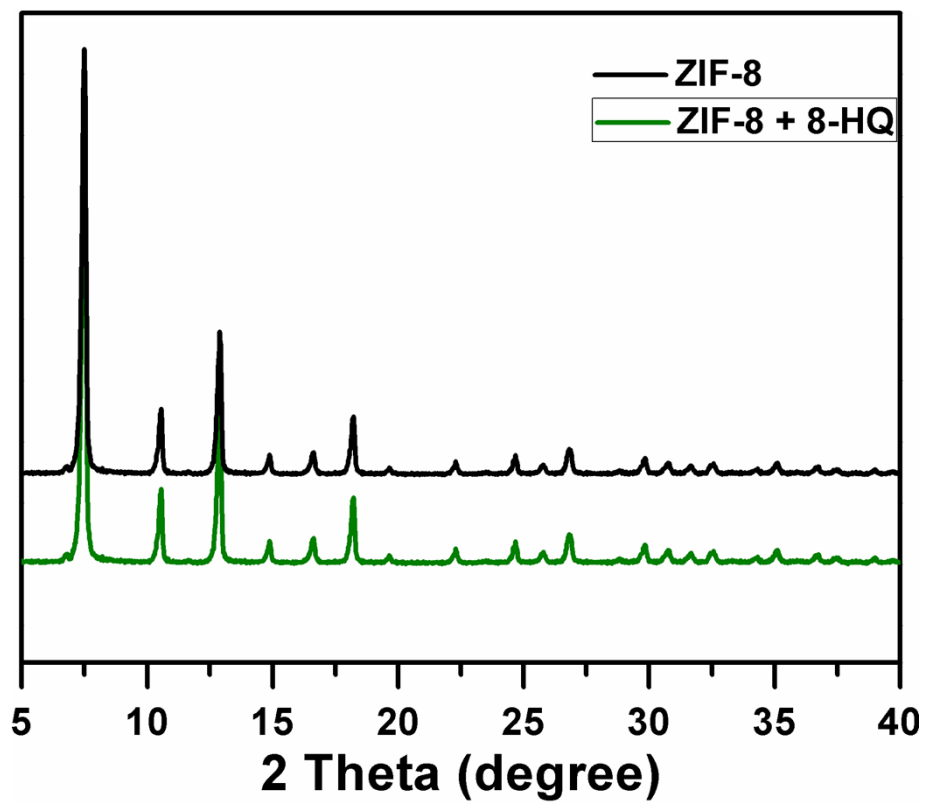

Fig.S11 XRD spectra of sole ZIF-8 and ZIF-8 after adsorption of 8-hydroxyquinoline (8-HQ)

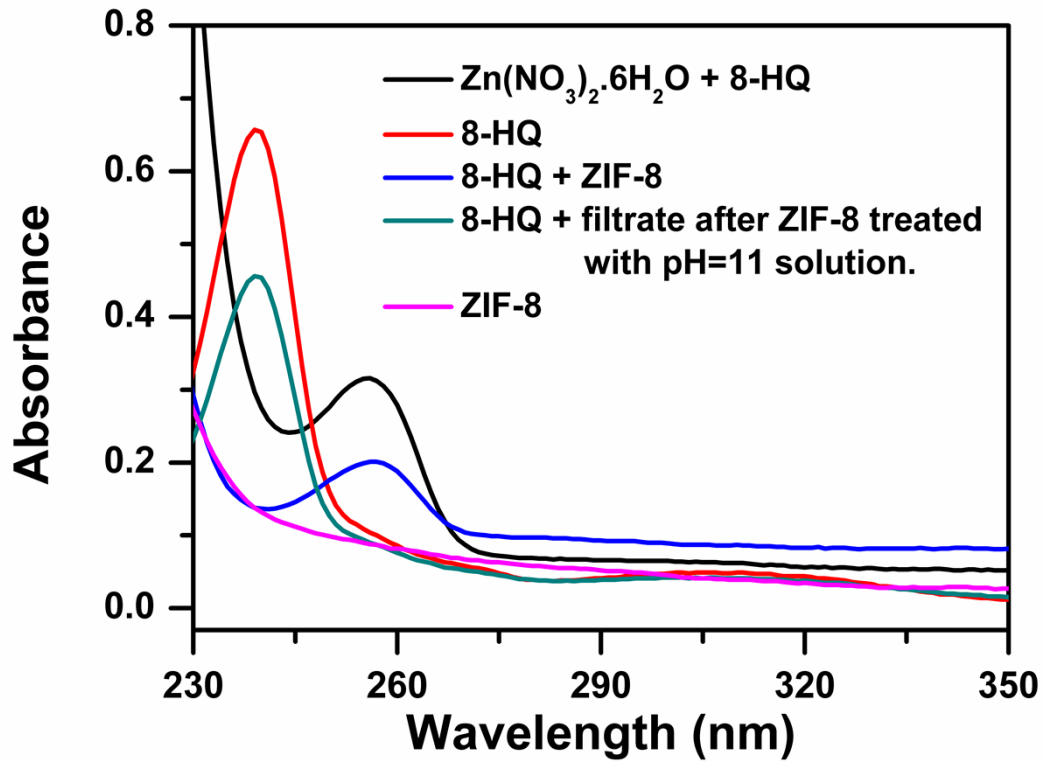

Fig.S12 UV-vis spectra for interaction of ZIF-8 and 8-hydroxyquinoline (8-HQ)

Table S1 Freundlich Parameters for TPE on ZIF-8.

| Temperature(K) | Freundlich adsorption isotherm model |       |        |
|----------------|--------------------------------------|-------|--------|
|                | $K_F$                                | n     | $R^2$  |
| 283.15         | 13.308                               | 2.120 | 0.9802 |
| 293.15         | 9.612                                | 1.823 | 0.9711 |
| 303.15         | 2.779                                | 1.236 | 0.9943 |

Table S2 The structure parameters of ZIF-8 and ZIF-8 adsorbed of TPE

| Sample                | $S_{\text{BET}}(\text{m}^2\text{g}^{-1})$ | Pore diameter(Å) | Pore volume( $\text{cm}^3\text{g}^{-1}$ ) |
|-----------------------|-------------------------------------------|------------------|-------------------------------------------|
| ZIF-8                 | 2205                                      | 11.6, 17         | 0.89                                      |
| ZIF-8 adsorbed of TPE | 1880                                      | 6.7, 9.4         | 0.74                                      |

Table S3 Effect of desorption solvent on desorption of TPE, DPE and CFE on ZIF-8

| Desorption solvent                     | TPE (%) | DPE (%) | CFE (%) |
|----------------------------------------|---------|---------|---------|
| 4 mL pH=11 tris                        | 42.5    | 4.2     | 16.4    |
| 2 mLacetonitrile<br>and 2 mL pH=11tris | 46.1    | 2.8     | 12.9    |
| 4 mL acetonitrile                      | 30.4    | 13.3    | 10.5    |
| 4 mL 0.1%ammonia                       | 48.3    | 3.8     | 15.3    |
| 4 mL 0.1M NaOH                         | 52.9    | 3.1     | 12.4    |



Table S4 The reusability of spent ZIF-8

| Reuse Cycle         | adsorption capacity (mg/g) |      |      |
|---------------------|----------------------------|------|------|
|                     | TPE                        | DPE  | CFE  |
| 1 <sup>st</sup> run | 9.97                       | 2.73 | 6.11 |
| 2 <sup>nd</sup> run | 10.01                      | 2.67 | 6.18 |
| 3 <sup>rd</sup> run | 9.77                       | 2.93 | 6.39 |
| 4 <sup>th</sup> run | 9.96                       | 2.65 | 6.35 |
| 5 <sup>th</sup> run | 10.01                      | 2.66 | 6.38 |
| RSD                 | 1.00                       | 4.00 | 2.00 |

## References

(Ref.S1) Park, K. S.; Ni, Z.; Côté, A. P.; Choi, J. Y.; Huang, R.; Uribe-Romo, F. J.; Chae, H. K.; O’Keeffe, M.; Yaghi, O. M., Exceptional chemical and thermal stability of zeolitic imidazolate frameworks. *Proceedings of the National Academy of Sciences* 2006, 103 (27), 10186-10191.

(Ref.S2) Banerjee, R.; Phan, A.; Wang, B.; Knobler, C.; Furukawa, H.; O’Keeffe, M.; Yaghi, O. M., High-Throughput Synthesis of Zeolitic Imidazolate Frameworks and Application to CO<sub>2</sub> Capture. *Science* 2008, 319 (5865), 939-943.

(Ref. S3) Demessence, A.; Boissiere, C.; Grosso, D.; Horcajada, P.; Serre, C.; Ferey, G.; Soler-Illia, G. J. A. A.; Sanchez, C., Adsorption properties in high optical quality nanoZIF-8 thin films with tunable thickness. *Journal of Materials Chemistry* 2010, 20 (36), 7676-7681.
